# Supplementary material
Source: MDPI journal article supplement (https://www.mdpi.com/2410-3888/8/11/559)
Supplement: s1 [file s1]

**Table S1** Composition of major catch fish catches in the Beibu Gulf from 2006 to 2018

| Taxa                            | Species                                                                                                                                                                                                                                                                                                                                                                                                                                                                                                                                      |
|---------------------------------|----------------------------------------------------------------------------------------------------------------------------------------------------------------------------------------------------------------------------------------------------------------------------------------------------------------------------------------------------------------------------------------------------------------------------------------------------------------------------------------------------------------------------------------------|
| <i>Acropoma japonicum</i>       | <i>Acropoma japonicum</i>                                                                                                                                                                                                                                                                                                                                                                                                                                                                                                                    |
| <i>Priacanthus macracanthus</i> | <i>Priacanthus macracanthus</i>                                                                                                                                                                                                                                                                                                                                                                                                                                                                                                              |
| Sciaenidae                      | <i>Pennahia argentata</i> , <i>Johnius carutta</i> , <i>Pennahia pawak</i> , <i>Semifasciata</i> , <i>Larimichthyscrocea</i> , <i>Pennahia macrocephalus</i> , <i>Johnius dussumieri</i> , <i>Otolithes ruber</i> , <i>Nibea albiflora</i> , <i>Aureus</i> , <i>Pennahia anea</i> , <i>Argyrosomus miichthioides</i> , <i>Johnius belangerii</i> , <i>Protonibea diacanthus</i> , <i>Wak sina</i> , <i>Otolithes</i>                                                                                                                         |
| Apogonidae                      | <i>Apogon carinatus</i> , <i>Apogon semilineatus</i> , <i>Apogon hyalosoma</i> , <i>Exostiyma</i> , <i>Apogon doederleini</i> , <i>Foa brachygramma</i> , <i>Apogon amboinensis</i> , <i>Apogonichthys ellioti</i> , <i>Arafurae</i> , <i>Archamia buruensis</i> , <i>Apogon coccineus</i> , <i>Cheilodipterus macrodon</i> , <i>Apogonichthys striatus</i> , <i>Papillapogonauritus</i> , <i>Apogon taeniatus</i> , <i>Apogon quadrifasciatus</i> , <i>Apogon ichthyslineatus</i> , <i>Rhabdamia cypselurus</i> , <i>Apogon kallopterus</i> |
| <i>Parargyrops edita</i>        | <i>Parargyropsedita</i>                                                                                                                                                                                                                                                                                                                                                                                                                                                                                                                      |
| <i>Decapterusmaruadsi</i>       | <i>Decapterusmaruadsi</i>                                                                                                                                                                                                                                                                                                                                                                                                                                                                                                                    |
| <i>Trachurus japonicus</i>      | <i>Trachurusjaponicus</i>                                                                                                                                                                                                                                                                                                                                                                                                                                                                                                                    |
| Leiognathidae                   | <i>Leiognathus lineolatus</i> , <i>Leiognathus equulus</i> , <i>Leiognathus brevirostris</i> , <i>Eubleekeria splendens</i> , <i>Equula binds</i> , <i>Secutor ruconius</i> , <i>Leiognathus rivulatus</i> , <i>Leiognathus berbis</i> , <i>Gazza minuta</i> , <i>Leiognathus elongatus</i>                                                                                                                                                                                                                                                  |
| Trichiuridae                    | <i>Trichiurus lepturus</i> , <i>Trichiurus brevis</i> , <i>Trichiurus nanhaiensis</i> , <i>Lepturacanthus savala</i> , <i>Pseudoxymetopon siensis</i>                                                                                                                                                                                                                                                                                                                                                                                        |
| <i>Saurida</i>                  | <i>Saurida tumbil</i> , <i>Saurida undosquamis</i>                                                                                                                                                                                                                                                                                                                                                                                                                                                                                           |
